# Supplementary material for: Stemphylium lycopersici Nep1-like Protein (NLP) Is a Key Virulence Factor in Tomato Gray Leaf Spot Disease
Source: MDPI journal article supplement (doi:10.3390/jof8050518), 2022-05-18
Supplement: s1 [file s1]

A

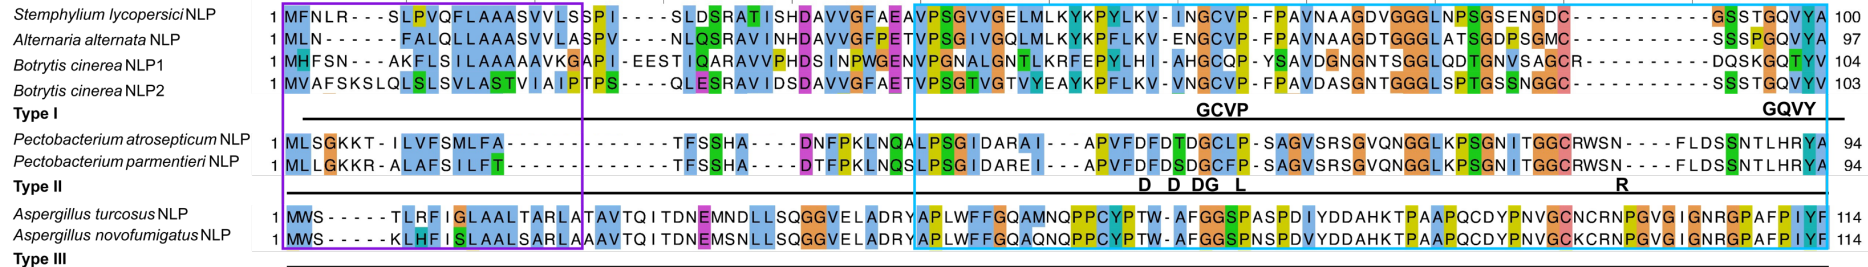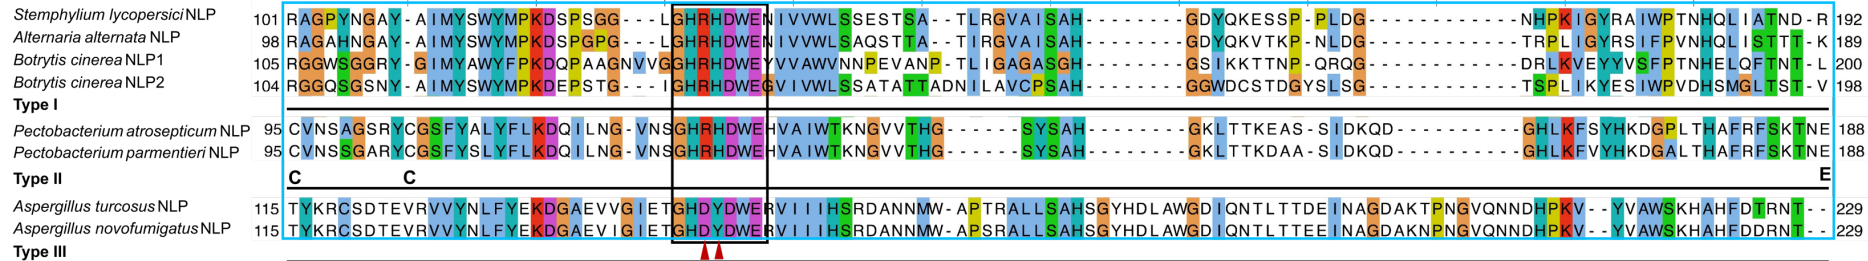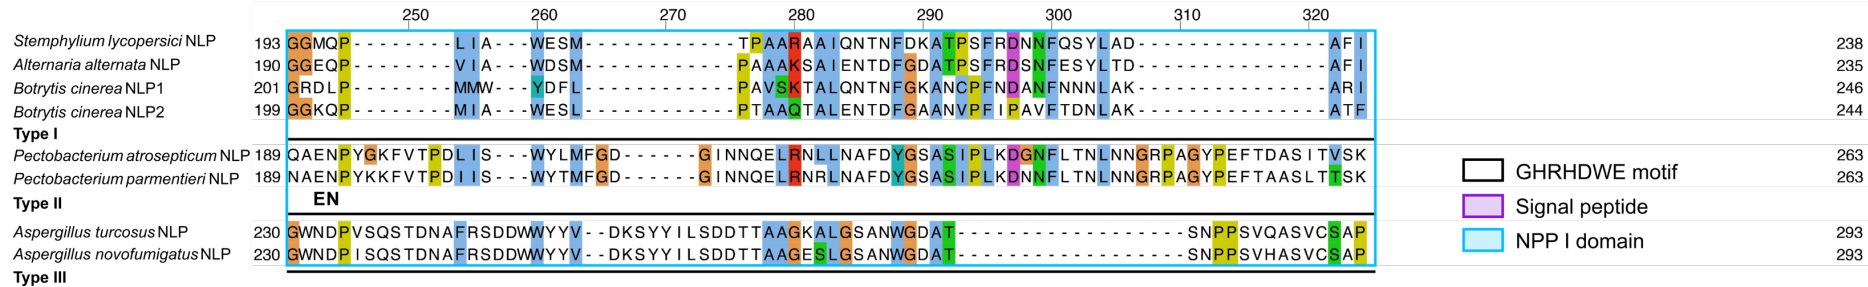

B

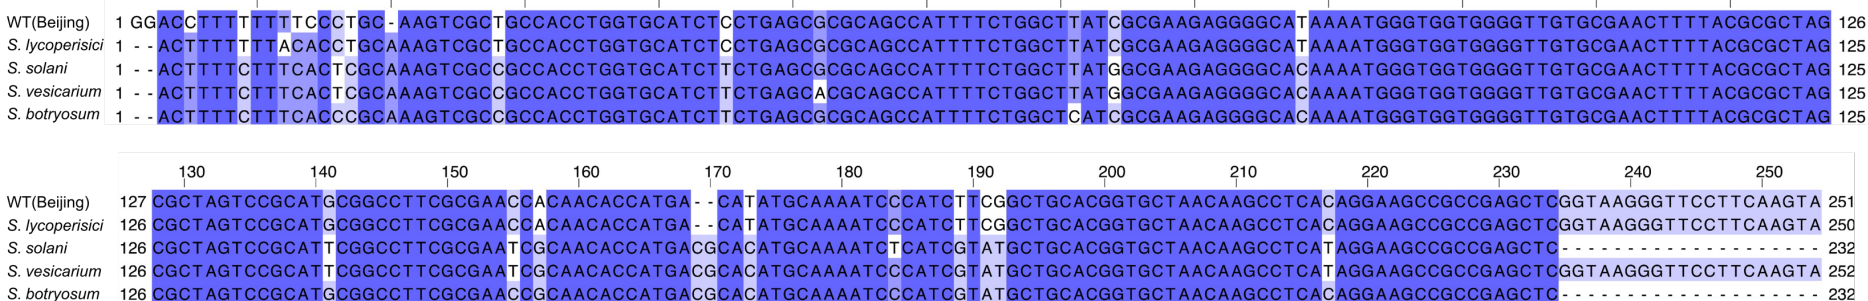

□ GHRHDWE motif  
 □ Signal peptide  
 □ NPP I domain

**Figure S1 .** Alignment of NLP proteins shows that *S. lycopersici* NLP is a type I NLP protein. **(A)** The *S. lycopersici* NLP protein sequence was aligned with typical type I, type II, and type III NLP proteins. Purple and blue boxes represent the signal peptide and NPP I domain, respectively. The black box highlights the most conserved heptapeptide motif (GHRHDWE) in the NPP1 domain; red triangles indicate the two amino acids (RH) which were conserved in type I and type II but divergent (DY) in type III NLPs. The conserved DxDxDG motif specific to type II NLPs is also noted. **(B)** A nucleotide alignment use *EF1 $\alpha$*  gene in *Stemphylium* spp. to confirm the WT strain is a *S. lycopersicis* strain. The alignment was performed by the Jalview with Muscle method (<http://www.jalview.org>, accessed on 15 May 2022). *EF1 $\alpha$*  gene sequence of WT (Beijing) strain used in this study, *S. lycopersici*, *Stemphylium solani*, *Stemphylium vesicarium*, and *Stemphylium botryosum* f. sp. *Lycopersici* were aligned.

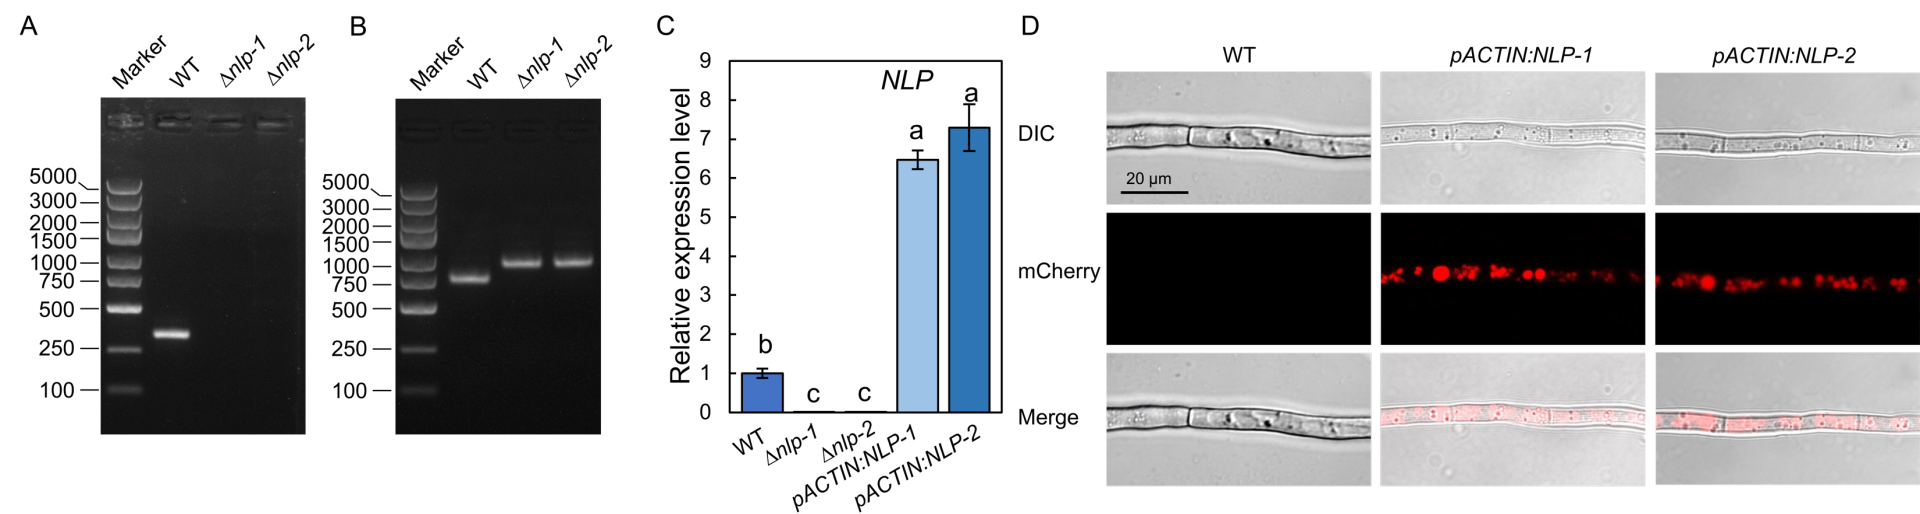

**Figure S2.** Confirmation of *NLP* gene knockout and overexpression *S. lycopersici* strains. **(A)** PCR results showing the targeted replacement of *NLP* gene in  $\Delta nlp-1$  and  $\Delta nlp-2$ . **(B)** PCR results of full-length amplification with primers (*NLP*-full-check) designed outside the gene indicate the length of *NLP* gene has changed in  $\Delta nlp-1$  and  $\Delta nlp-2$ . **(C)** Relative expression of *NLP* gene in the WT,  $\Delta nlp-1$ ,  $\Delta nlp-2$ , *pACTIN:NLP-1*, and *pACTIN:NLP-2* strains determined by RT-qPCR. **(D)** mCherry fluorescence in *pACTIN:NLP* strains. Lowercase of a, b, and c denotes significant difference among multiple groups ( $p < 0.05$ ) by Duncan's new multiple range test.



## CRISPR site2

[illegible]

**Figure S3.** Confirmation of *NLP* gene knockout strains by sequence alignment. The red box represents the regions where the *NLP* gene has been replaced by the hygromycin B resistance marker gene (*hph*). The yellow and dark boxes represent CRISPR site 1 and 2 respectively.



A

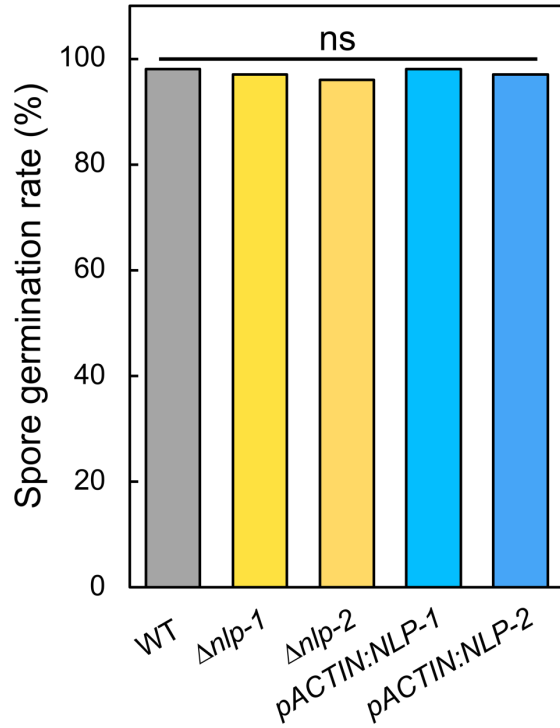

B

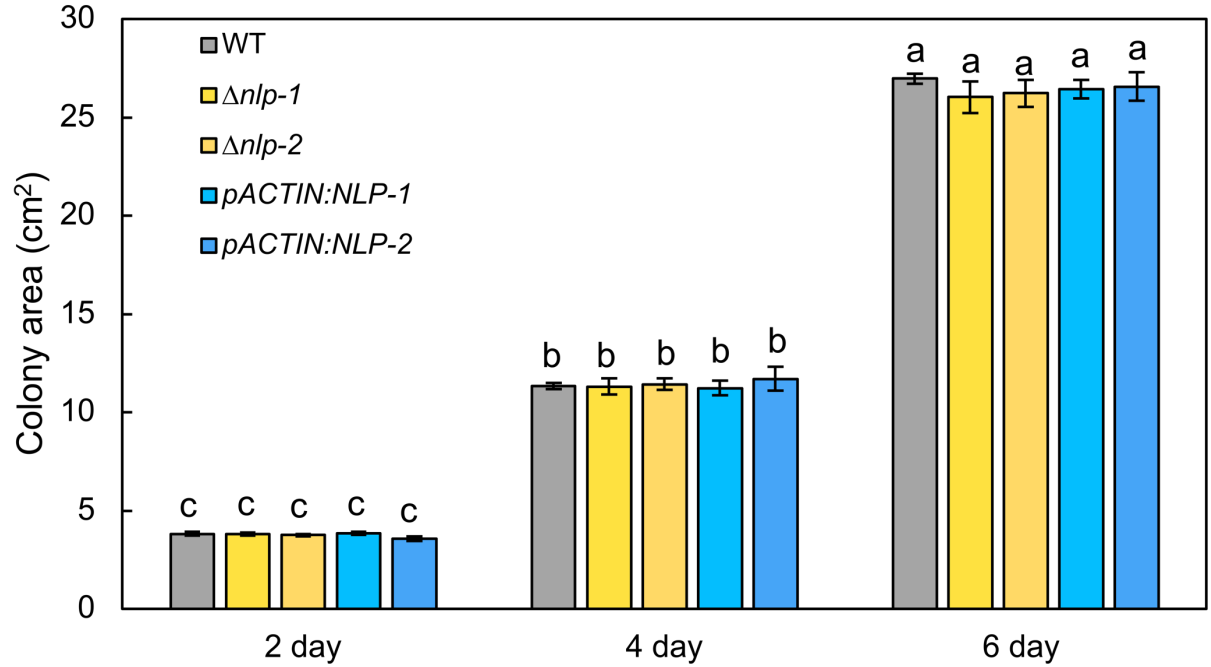

**Figure S4.** NLP does not affect spore germination and colony growth. **(A)** Conidial germination rate of the WT, *NLP* gene knockout mutants, and overexpression strains. **(B)** Colony growth of WT, *NLP* gene knockout mutants, and overexpression strains. Strains were grown on CM medium and colony growth was measured at days 2, 4, and 6 after inoculation. Statistical analyses were conducted using the DPS software; a, b, and c designate statistically significant differences. Lowercase of a, b, and c denotes significant difference among multiple groups ( $p < 0.05$ ) by Duncan's new multiple range test. ns denotes no significant differences.

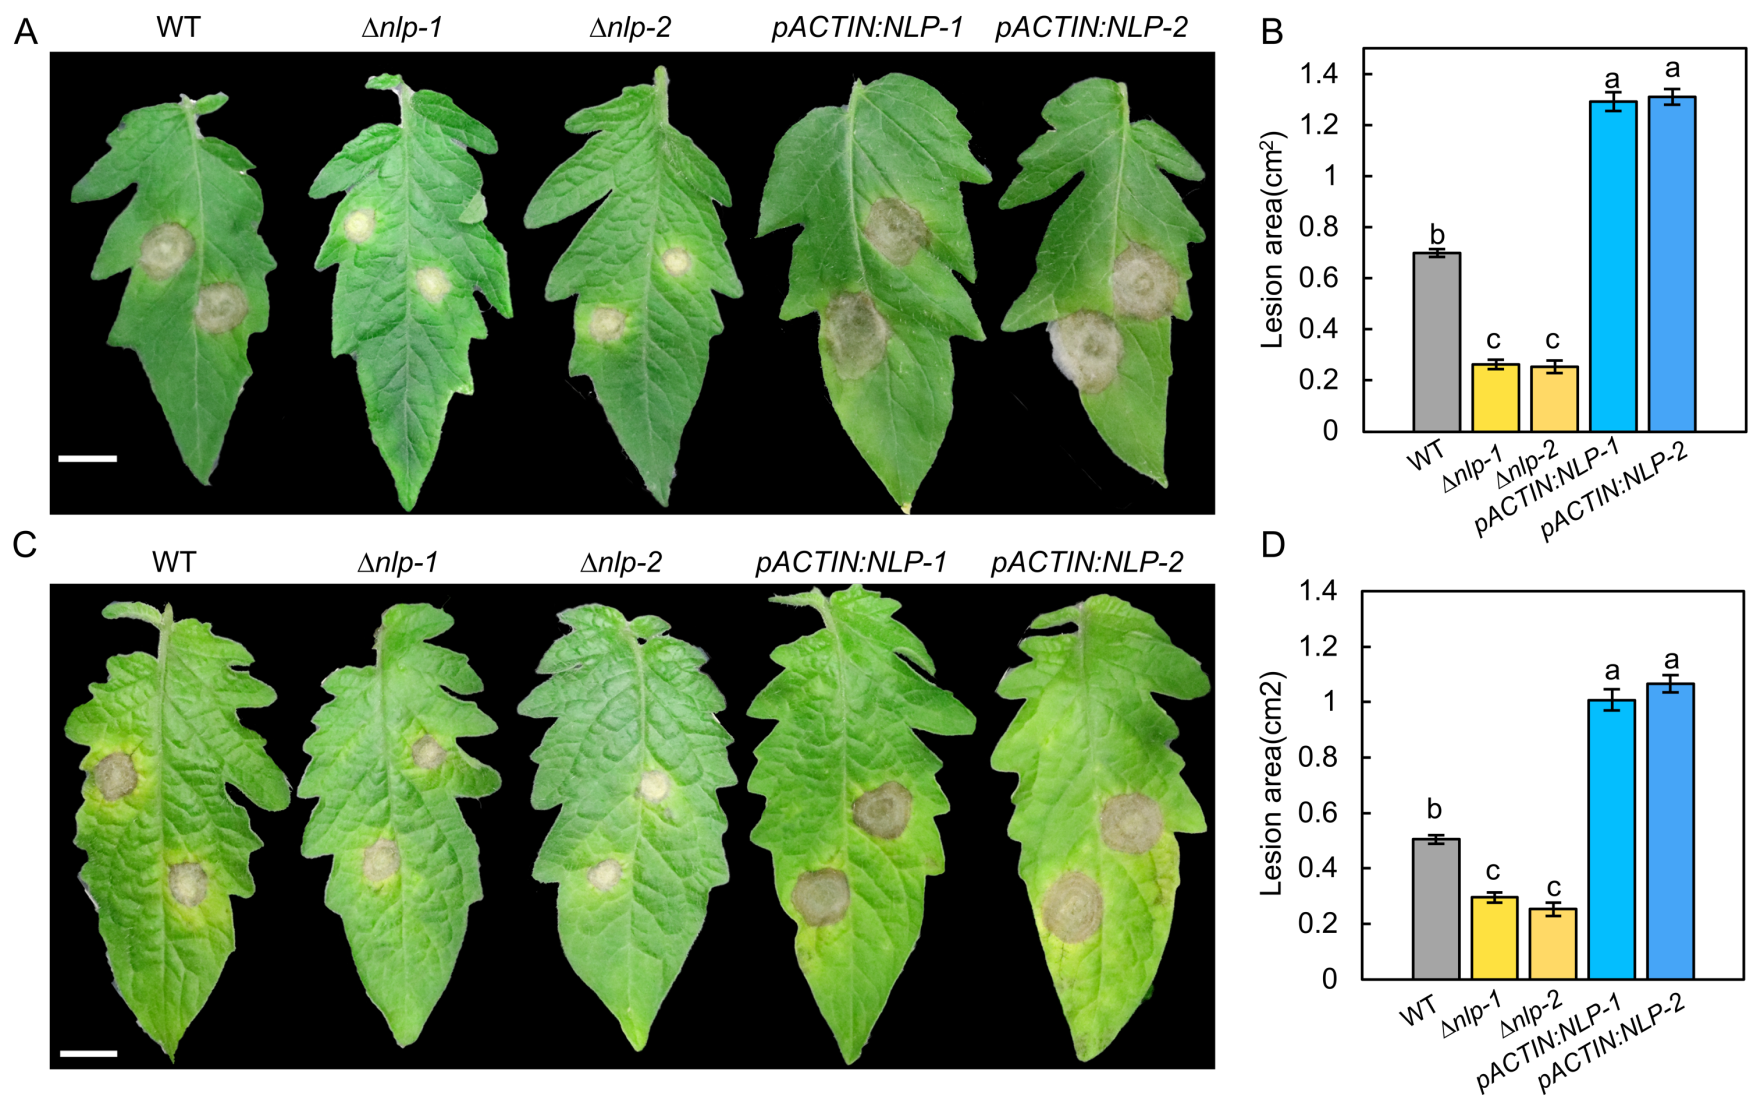

**Figure S5.** NLP is a key virulence factor of *S. lycopersici* during infection on other tomato cultivars. (A) Infected leaves of tomato cultivar AC (Ailsa Craig) by the WT,  $\Delta nlp$ , and overexpression strains at 5 days post inoculation (dpi). (B) Lesion area of tomato leaves of AC resulting from *S. lycopersici* infection of WT,  $\Delta nlp$ , and overexpression strains. (C) Infected leaves of tomato cultivar E6203 by the WT,  $\Delta nlp$ , and overexpression strains at 5 days post inoculation (dpi). (D) Lesion area of tomato leaves (E6203) resulting from infection of WT,  $\Delta nlp$ , and overexpression strains. Lowercase of a, b, and c denotes significant difference among multiple groups ( $p < 0.05$ ) by Duncan's new multiple range test.



Table S1 Primers for fungi NLP identification and gene manipulation

| ID                  | Primers sequences                                           |
|---------------------|-------------------------------------------------------------|
| ITS1                | TCCGTAGGTGAACCTGCGG                                         |
| ITS4                | TCCTCCGCTTATTGATATGC                                        |
| EF1- $\alpha$ -F    | CATCGAGAAGTTCGAGAAGG                                        |
| EF1- $\alpha$ -R    | TACTTGAAGGAACCCTTACC                                        |
| gpd-F               | CAACGGCTTCGGTCGCATTG                                        |
| gpd-R               | GCCAAGCAGTTGGTTGTGC                                         |
| NLP U6-1 -crispr -F | TTTATTGAGCTTCTCTTCGTCTCCCACGATGCTGTAGTGTTTTAGAGCTAGAAATAGCA |
| NLP U6-1 -crispr -R | CTATTCTAGCTCTAAACTTGATGACCTTCAAGTATGCGAAGAGAAGCTCAATAAAGT   |
| NLP-left-F          | GGAGGCAGTTTGGATGAATGAC                                      |
| NLP-lef-R           | CTTGTCTCCTGGTGATGATTCTG                                     |
| NLP-right-F         | AGGTGGGGGAAGGATTATAGT                                       |
| NLP- right-R        | AAAGTCTGCGGGGAGAGGTG                                        |
| NLP-TG-check-F      | AGCGTTGTTCTTTCATCCCC                                        |
| NLP-TG-check-R      | AGCCGCAGTCGCCATTCT                                          |
| NLP-full-check-F    | ACTACTTCGTGACAGTCACTCGCTC                                   |
| NLP-full-check-R    | CGACATGGATTTCAATTCATGTTCACTACAG                             |
| Fungi-NLP-OE-F      | TGAGAGAGCCCGTTTCTGACAGCTCTGCAG ATGTTCAACCTTCGAAGCCTAC       |
| Fungi-NLP-OE-R      | CATGTTATCCTCCTCGCCCTTGCTCACCATGATGAATGCATCCGCAAGGT          |

Table S2 Primers for *NLP* gene overexpression in tomato

| ID              | Primers sequences                                        |
|-----------------|----------------------------------------------------------|
| Tomato-NLP-OE-F | ACAAGTTTGTACAAAAAAGCAGGCTTCCTCGAGATGTTCAACCTTCGAAGCCTACC |
| Tomato-NLP-OE-R | ACCACTTTGTACAAGAAAGCTGGGTGAATTCGATGAATGCATCCGCAAGGTA     |



Table S3 Primers Used for RT-qPCR

| ID                  | Primers sequences       |
|---------------------|-------------------------|
| NLP-qRT-F           | GCTCACGGCGACTACCAAA     |
| NLP-qRT-R           | TGCTCTCCCACGCAATCAG     |
| Fungi-ACTIN-qRT-F   | TCCGTGACATCAAGGAGAAGC   |
| Fungi-ACTIN-qRT-R   | CAAGACAGAAGGCTGGAAAAGA  |
| Tomato-ACTIN2-qRT-F | TTGCTGACCGTATGAGCAAG    |
| Tomato-ACTIN2-qRT-R | GGACAATGGATGGACCAGAC    |
| PR-STH2-qRT-F       | GAAGGGGATCCATTGGGACAA   |
| PR-STH2-qRT-R       | TTCCCATAGCACTATCTTTTCCA |
| ERF.C3-qRT-F        | TGCTGAAGGATCATCGCAAG    |
| ERF.C3-qRT-R        | ACCTAGCCATACACGAACACC   |
